# Supplementary material for: Identification of microRNA signatures in umbilical cord blood associated with maternal characteristics
Source: PeerJ. 2019 May 30;7:e6981. doi: 10.7717/peerj.6981 (PMC6545228; doi:10.7717/peerj.6981)
Supplement: Table S9 [file peerj-07-6981-s002.xlsx]

## Sheet: Sheet1
Age		Pregnancy weight gain		Blood type				Rh factor		Allergies		Addictive substance abuse		Smoking status
<34 years	>34 years	<12 kg	>12 kg	A	B	AB	0	positive	negative	Yes	No	Yes	No	Non-smoker	Smoker	Stop-smoker
TNG_P_030M	TNG_P_039M	TNG_P_067M	TNG_P_022M	TNG_P_045M	TNG_P_043M	TNG_P_059M	TNG_P_064M	TNG_P_039M	TNG_P_084M	TNG_P_097M	TNG_P_050M	TNG_P_097M	TNG_P_102M	TNG_P_102M	TNG_P_024M	TNG_P_097M
TNG_P_025M	TNG_P_080M	TNG_P_080M	TNG_P_054M	TNG_P_070M	TNG_P_025M	TNG_P_046M	TNG_P_097M	TNG_P_080M	TNG_P_097M	TNG_P_024M	TNG_P_022M	TNG_P_024M	TNG_P_084M	TNG_P_084M	TNG_P_045M	TNG_P_063M
TNG_P_081M	TNG_P_059M	TNG_P_030M	TNG_P_059M	TNG_P_050M	TNG_P_022M	TNG_P_041M		TNG_P_064M	TNG_P_024M	TNG_P_102M	TNG_P_067M	TNG_P_045M	TNG_P_031M	TNG_P_031M	TNG_P_077M	TNG_P_054M
TNG_P_022M	TNG_P_045M	TNG_P_102M	TNG_P_024M	TNG_P_030M	TNG_P_067M	TNG_P_031M		TNG_P_045M	TNG_P_043M	TNG_P_045M	TNG_P_043M	TNG_P_063M	TNG_P_080M	TNG_P_080M		TNG_P_064M
TNG_P_041M	TNG_P_043M	TNG_P_045M	TNG_P_064M	TNG_P_081M		TNG_P_102M		TNG_P_070M	TNG_P_031M	TNG_P_063M	TNG_P_039M	TNG_P_054M	TNG_P_030M	TNG_P_030M		TNG_P_070M
TNG_P_067M	TNG_P_070M	TNG_P_046M	TNG_P_084M	TNG_P_048M				TNG_P_050M	TNG_P_102M	TNG_P_054M	TNG_P_064M	TNG_P_064M	TNG_P_081M	TNG_P_081M		TNG_P_046M
TNG_P_031M	TNG_P_046M	TNG_P_043M	TNG_P_031M	TNG_P_063M				TNG_P_030M		TNG_P_084M	TNG_P_070M	TNG_P_070M	TNG_P_048M	TNG_P_048M
TNG_P_048M	TNG_P_084M	TNG_P_050M	TNG_P_048M	TNG_P_024M				TNG_P_081M		TNG_P_031M	TNG_P_077M	TNG_P_077M	TNG_P_050M	TNG_P_050M
TNG_P_102M	TNG_P_050M	TNG_P_039M	TNG_P_070M	TNG_P_054M				TNG_P_048M		TNG_P_080M	TNG_P_025M	TNG_P_046M	TNG_P_022M	TNG_P_022M
TNG_P_063M		TNG_P_077M	TNG_P_041M	TNG_P_077M				TNG_P_063M		TNG_P_030M	TNG_P_059M		TNG_P_067M	TNG_P_067M
TNG_P_064M		TNG_P_081M	TNG_P_063M					TNG_P_054M		TNG_P_081M	TNG_P_046M		TNG_P_043M	TNG_P_043M
TNG_P_024M		TNG_P_025M	TNG_P_097M					TNG_P_077M		TNG_P_048M	TNG_P_041M		TNG_P_025M	TNG_P_025M
TNG_P_054M								TNG_P_025M					TNG_P_059M	TNG_P_059M
TNG_P_077M								TNG_P_022M					TNG_P_041M	TNG_P_041M
TNG_P_097M								TNG_P_067M					TNG_P_039M	TNG_P_039M
								TNG_P_059M
								TNG_P_046M
								TNG_P_041M
